# Supplementary material for: Revisiting the Lamotrigine-Mediated Effect on Hippocampal GABAergic Transmission
Source: MDPI journal article supplement (doi:10.3390/ijms17071191), 2016-07-22
Supplement: s1 [file s1]

# Supplementary Materials: Revisiting Lamotrigine-Mediated Effect on Hippocampal GABAergic Transmission

Yu-Yin Huang, Yu-Chao Liu, Cheng-Ta Lee, Yen-Chu Lin, Mong-Lien Wang, Yi-Ping Yang, Kaung-Yi Chang and Shih-Hwa Chiou

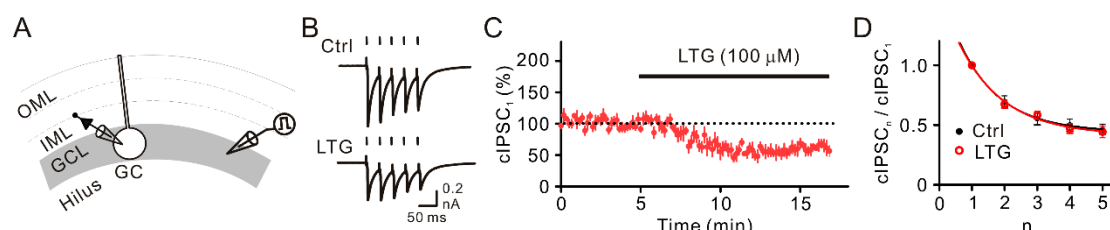

**Figure S1.** LTG inhibited compound IPSCs without affecting multiple pulse ratio at BC-GC synapse. (A) Schematic diagram showing extracellular stimulation of IN axons in the GCL and GC recording; (B) Compound IPSCs were evoked by stimulation protocol (25 Hz burst of 5 current pulses every 10 s) and the corresponding cIPSC traces (average of 25 sweeps) before and after treatment of LTG (100 μM). Note that LTG did not alter short-term synaptic plasticity. Vertical ticks represent the stimulation pulses; (C) Plot of their corresponding normalized cIPSC1 amplitude in control and after bath perfusion of LTG (100 μM) from 7 experiments. Horizontal bar represents time of LTG application. Symbols indicate mean; error bars indicate SEM; (D) Mean ratio of cIPSCn/cIPSC1 plotted against the number within the train ( $n$ ).
